# Supplementary material for: Effect of an Enhanced Self-Care Protocol on Lymphedema Status among People Affected by Moderate to Severe Lower-Limb Lymphedema in Bangladesh, a Cluster Randomized Controlled Trial
Source: MDPI journal article supplement (doi:10.3390/jcm9082444), 2020-07-30
Supplement: s1 [file s1]

## Supplementary Figure 2. The Indurometer

Flinders and SA Biomedical Engineering, Australia

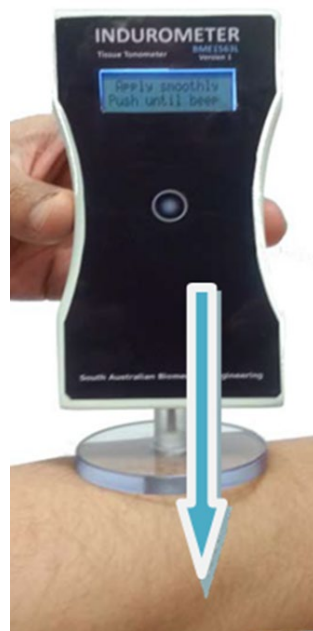

### Indurometer calibration and instruction sheet

| Calibrate each device once per day (before the first measure)<br>See over for calibration instructions                                                                                                                                                                                                                                                                                                                                                                                                                                                                                                                                                                                                                                                                                                                                                                                                                                                                                                                                                                                                                                                                                                                                                                                                                                                                                                                                                                                                                                                                                  | Calibrate both devices once per day (before the first measure)                                                                                                                                                                                                                                                                                                                                                                                                                                                                                                                                                                                                                                                                                                                                                                                                                                                                                                                                                                                                                                                                                                                                                                                                                                                                                                                                                                                                                                                                                                                                                                                                                                                                                                                                                                                                                                                                                                                                                                                                                                              |
|-----------------------------------------------------------------------------------------------------------------------------------------------------------------------------------------------------------------------------------------------------------------------------------------------------------------------------------------------------------------------------------------------------------------------------------------------------------------------------------------------------------------------------------------------------------------------------------------------------------------------------------------------------------------------------------------------------------------------------------------------------------------------------------------------------------------------------------------------------------------------------------------------------------------------------------------------------------------------------------------------------------------------------------------------------------------------------------------------------------------------------------------------------------------------------------------------------------------------------------------------------------------------------------------------------------------------------------------------------------------------------------------------------------------------------------------------------------------------------------------------------------------------------------------------------------------------------------------|-------------------------------------------------------------------------------------------------------------------------------------------------------------------------------------------------------------------------------------------------------------------------------------------------------------------------------------------------------------------------------------------------------------------------------------------------------------------------------------------------------------------------------------------------------------------------------------------------------------------------------------------------------------------------------------------------------------------------------------------------------------------------------------------------------------------------------------------------------------------------------------------------------------------------------------------------------------------------------------------------------------------------------------------------------------------------------------------------------------------------------------------------------------------------------------------------------------------------------------------------------------------------------------------------------------------------------------------------------------------------------------------------------------------------------------------------------------------------------------------------------------------------------------------------------------------------------------------------------------------------------------------------------------------------------------------------------------------------------------------------------------------------------------------------------------------------------------------------------------------------------------------------------------------------------------------------------------------------------------------------------------------------------------------------------------------------------------------------------------|
| <p><b>Use device 'A' for every measure.</b><br/>If the device is not working use device 'B' and complete a protocol deviation form</p> <ol style="list-style-type: none"> <li>1. Push the button to begin the measure</li> <li>2. The display will show-<br/> <div>Apply smoothly<br/>Push until beep</div> </li> <li>3. Use the same midpoint mark on the calf that you used for the circumference measures</li> <li>4. Align the plunger of the Indurometer with this mark</li> <li>5. Keep the footplate parallel with the skin and press the device smoothly and gently into the skin</li> <li>6. DO NOT HOLD it there. Remove it as soon as you hear the beep</li> <li>7. If you hear a single beep the measure was successful and the score will be displayed with 2 decimal places-<br/> <div>X.XX IU<br/>Press BUTTON</div></li> <li>8. Record this score in your data collection form.</li> <li>9. If you hear two beeps the measure was not successful. The screen will tell you if it was <b>too fast or too slow</b></li> <li>10. Reset the device and try again</li> </ol> <div> <div> <p><b>GOOD TECHNIQUE</b><br/>The footplate is FLAT to the skin</p> <p><b>DO NOT apply heavy pressure</b><br/><b>DO NOT keep pressing after the beep</b></p> <p><b>BAD TECHNIQUE</b><br/>The footplate is NOT FLAT to the skin</p> </div> <p>If the calf is narrower than the footplate</p> <p>Align the footplate to the middle of the leg so that the <b>GAPS ON EITHER SIDE ARE EVEN</b> and the footplate is <b>AS FLAT AS POSSIBLE</b> along the length of the calf.</p> </div> | <p><b>Use device 'A' for every measure</b><br/>If device 'A' cannot be calibrated, use device 'B' and complete a protocol deviation form</p> <ol style="list-style-type: none"> <li>1. Turn the Indurometer OFF by pressing and holding the button for 5 seconds or until you see <b>Turning OFF 3</b> displayed on the screen. Wait until the screen is blank.</li> <li>2. Press and hold the button for 5 seconds again until you see the display-<br/> <div>CAL MODE<br/>Press BUTTON</div></li> <li>3. Press the button again briefly and the screen will display-<br/> <div>ZERO and CAL CHECK</div> and then-<br/> <div>Hold Steady<br/>Press BUTTON</div></li> <li>4. Make sure nothing is touching the footplate or plunger and press the button again. The screen will display- <b>Zeroing Please wait</b></li> <li>5. After a few seconds you will hear a beep and the screen will display-<br/> <div>Invert. Add 200g<br/>Press BUTTON</div></li> <li>6. Place the Indurometer upside down on a flat surface with the footplate at the top and gently push the footplate down half way.</li> <li>7. Keeping the footplate held down, add the weight to the plunger - there is a hole in the weight where the plunger fits.</li> <li>8. Make sure the weight is not touching the footplate or your finger or anything other than the plunger.</li> <li>9. Briefly press the button and continue holding the device in this position. You will momentarily see <b>'Calibrating please wait'</b> on the screen.</li> <li>10. After you hear a beep you can gently remove the weight and hold the Indurometer upright. The display will show some numbers like 123 456 789. You can ignore this.</li> <li>11. Briefly press the button again. There are two possible displays-<br/> <div>CAL complete<br/>Press BUTTON</div> or- <div>CAL required<br/>Press BUTTON</div></li> </ol> <p>If the calibration has been successful press the button again and you can begin the first measure</p> <p>If the calibration was not successful, press the button and begin the calibration process again</p> |

**DO NOT use alcohol based solvents to clean the Indurometer**
