# Supplementary material for: Effect of an Enhanced Self-Care Protocol on Lymphedema Status among People Affected by Moderate to Severe Lower-Limb Lymphedema in Bangladesh, a Cluster Randomized Controlled Trial
Source: MDPI journal article supplement (doi:10.3390/jcm9082444), 2020-07-30
Supplement: s1 [file s1]

## Supplementary Figure 3. Intervention protocols

*Participant brochure on the allocates self-care activities – Standard self-care group*

[illegible]

## পা এবং পায়ের পাতা ধোওয়া এবং শুকানো

সকাল মাথানো কাপড় দিয়ে একেবারে পা আঁড়ে আঁড়ে ধুয়ে ফেলুন।  
চামড়ার ভাজে এবং আঙ্গুলের মাঝে পরিষ্কার করুন।  
চামড়ার উপরে থকা এবং খুঁটেনে না।  
পরিষ্কার পানি দিয়ে ধুয়ে ফেলুন।  
অপর পায়ের জন্য আরেকটি পরিষ্কার কাপড় ব্যবহার করুন।






শুকনা পরিষ্কার কাপড় দিয়ে পা মুছে ফেলুন।  
আব্রাশক্তি যতেনে না।  
চামড়ার উপরে বাঘা হলে একটিক থেকে ত্রিশ ত্রিশ মুছে ফেলুন।  
চামড়ার ভাজে এবং আঙ্গুলের মাঝে শুকনো মুছে ফেলুন।  
ব্যবহারের পরে সকল কাপড় ধুয়ে শুকিয়ে ফেলুন।

নখ কাটার সঠিক সময় পা বেঘার পরে।  
নখের পাশে বেশী কাটবেন না।  
চামড়ার উপরিভাগে আঘাত করবেন না।




## ক্ষতের যত্ন নিন, ক্রিম লাগান, নখ ছোট রাখুন

কাপে করে বেয়াল রাখুন কলর চামড়া এবং যেটি যাওয়া চামড়ার উপরিভাগের দিকে।  
আপনার সহযোগকারীকে আপনার আঙ্গুলের আঙ্গুলের মাঝখানে দেখতে বলুন।  
পায়ের ক্ষতের উপরে বা কাছাকাছি হলে অথবা আঙ্গুলের মাঝখানে ক্রিম লাগান।




## প্রতিটি ব্যায়াম দিনে কমপক্ষে ৫ বার করুন।

সাদানো অবস্থায় আঙ্গুলের উপরে সাদানো এবং নাড়ুন।  
নেড়ালে হাত রেখে অথবা চেয়ারের উপরে হাত রেখে আরসামা বন্ধ করুন।  
যতবার এবং যতসময় ধরে সম্ভব ততবার এবং তত সময় ধরে করুন।




পায়ের লিমফেডিমার যত্ন করলে  
চামড়ার উন্নতি হয়, ক্ষত ভাল হয়  
এবং তাত্ক্ষণিক আক্রান্ত  
কমে যায়

[illegible]

**পা এক পায়ের পাড়া খোঁজা একে কবানো**

সবশেষ মাথামে কাপড় দিয়ে একেক পা আছে আছে দুয়ে ফেলুন।  
চামড়ার ভাঙা একে আঙ্গুলের মাঝে পরিষ্কার করুন।  
চামড়ার উপরে ঘষা একে ছুঁতে নো।  
পরিষ্কার পদমি দিয়ে বুঝে ফেলুন।  
অপর পায়ের জন্য আঙুলের পরিষ্কার কাপড় ব্যবহার করুন।



**ফতের যত্ন নিম্ন, ক্রিম লাগান, নখ ছোট রাখুন**

হাতের করে খোসাল লাগুন অল্প ভাঙা একে সেরে যাওয়া চামড়ার উপরিভাগের দিকে।  
আঙ্গুলের মাধ্যমিকারীক আঙ্গুলের আঙ্গুলের মাধ্যমে দেখতে কনুন।  
পায়ের ফতের উপরে বা বাহা পাড়ার ছাদে অপর আঙ্গুলের মাধ্যমে ক্রিম লাগান।



চামড়া পরিষ্কার কাপড় দিয়ে পা বুঝে ফেলুন।  
"ভাঙাভাঙি খাটবে না।"  
চামড়ার উপরে ঘাষা হলে একটিক থেকে চেপে চেপে ফেলুন।  
চামড়ার ভাঙা একে আঙ্গুলের মাঝে থাকতে বুঝে ফেলুন।  
ব্যবহারের পরে সকল কাপড় বুঝে ফেলুন।




নখ কাটার সঠিক সময় পা বেচার পরে।  
নখের পাত্রে বেশী কটনো না।  
চামড়ার উপরিভাগে আঙ্গুল কটনো না।



**প্রতিটি ব্যায়াম নিম্নে কমপক্ষে ৫ বার করুন।**

**সাদুসে অঙ্গপ্রত্যঙ্গ** আঙ্গুলের উপরে সাদুসে একে, যমুন।  
সেখানে হাত রেখে অপর চোম্বের উপরে হাত রেখে ধরসেয়া হক্স করুন।  
যতবার একে, যতবার করে সঙ্গত ততবার একে, তত সতর্ক করে করুন।





**চামড়ার উপরিভাগে ম্যাসাজ একে, সতল করা**

পায়ের মাংশদেশীভাগে ঝাঁকুর চোলাগনে বুজান।  
সবটুকু খুব সাবধনভাৱে সোমে করুন, যদি বাহ্যিকভাবে অন্যে অস্বস্তিকর হয় তবে বন্ধ করুন।  
পায়ের কনুন দিক থেকে ম্যাসাজ করে কনুন থেকে ছাড়া সোমে করে পায়ের উপরে টুল।  
ম্যাসাজ তখন পরে বুজিয়ে ঝাঁকুর দিকের দিকে টুলে যান।  
পায়ের পাড়া থেকে ঝাঁকু পড়ি ম্যাসাজ করুন।  
পায়ের পাড়া একে আঙ্গুলে ম্যাসাজ করুন।




**নখ অঙ্গপ্রত্যঙ্গ** পা হাত করুন মাথামে দিয়ে ফেলুন একে আঙ্গুল টুল করে ধরে।  
উপরে নিচে পায়ের পাত্রে দিক করুন। হাতের সতর্ক করুন।  
পা উঠিয়ে তুলুন এক পা এক ধরে।

**সোমে আঙ্গুলে বাহ্যিক ঝাঁকু করুন একে, পা বেচারে কনুন।**  
এ নখ পা উপরে দিক করুন, এক পা একবার করুন।  
হুটু কনুন দিক থেকে আঙ্গুল ঝাঁকু দান হাতের মাঝে।  
এটু সেরে নিম্ন ঝাঁকু দান সোমের মাঝে।  
সোমের সতর্ক করুন। ঝাঁকু সোমেরে হাতের মাঝে মাধ্যমে সোমেরে দান।




**চীর্থ দান সোমেরে হাতের দিক আঙ্গুলে বার করে করুন।**  
**চীর্থ দান সোমেরে সোমে পেরে বুঝে উঠে, কনুন কনুন না**

**পায়ের পিমেফটিমার যত্ন করলে চামড়ার উজ্জ্বল হয়, কত ভাল হয় একে তাৎক্ষণিক আয়তের**

**কনুন হাট**



হাটের পাত্রে পায়ের জন্য দান  
হাতের দিক ৯০ ডিগ্রি হাটের প্রমাণ করুন।
