# Supplementary material for: Effect of an Enhanced Self-Care Protocol on Lymphedema Status among People Affected by Moderate to Severe Lower-Limb Lymphedema in Bangladesh, a Cluster Randomized Controlled Trial
Source: MDPI journal article supplement (doi:10.3390/jcm9082444), 2020-07-30
Supplement: s1 [file s1]

## Supplementary Table 6. Working days lost to lymphoedema

*Working days lost due to lymphoedema at 4-, 12- and 24-weeks by stage and group*

|                                                                             | <b>Moderate</b>      |                      | <b>Severe</b>        |                      |
|-----------------------------------------------------------------------------|----------------------|----------------------|----------------------|----------------------|
|                                                                             | <b>Control</b>       | <b>Intervention</b>  | <b>Control</b>       | <b>Intervention</b>  |
| <b><i>Number of days lost over the previous 6-months - Median (IQR)</i></b> |                      |                      |                      |                      |
| <b>Baseline</b>                                                             | 21.25 (12.82, 29.68) | 23.49 (14.53, 32.45) | 25.06 (13.37, 36.74) | 25.64 (12.41, 38.87) |
| <b>24-weeks</b>                                                             | 2.30 (1.26, 3.33)    | 5.60 (3.38, 7.83)    | 5.46 (2.79, 8.14)    | 4.36 (1.88, 6.83)    |
|                                                                             | -18.95               | -17.89               | -19.6                | -21.28               |
| <b><i>Number of days lost over the previous 1-month - Median (IQR)</i></b>  |                      |                      |                      |                      |
| <b>Baseline</b>                                                             | 4.31 (2.94, 5.68)    | 4.72 (3.32, 6.12)    | 4.67 (2.9, 6.44)     | 5.31 (3.00, 7.62)    |
| <b>4-weeks</b>                                                              | 2.13 (1.37, 2.89)    | 2.61 (1.78, 3.43)    | 2.65 (1.57, 3.73)    | 3.48 (1.88, 5.08)    |
| <b>12-weeks</b>                                                             | 1.71 (1.06, 2.36)    | 2.27 (1.53, 3.01)    | 1.86 (1.05, 2.67)    | 2.4 (1.22, 3.58)     |
| <b>24-weeks</b>                                                             | 1.29 (0.76, 1.83)    | 1.69 (1.11, 2.27)    | 0.93 (0.45, 1.41)    | 1.35 (0.59, 2.1)     |
|                                                                             | -3.02                | -3.03                | -3.74                | -3.96                |

*Control = standard self-care, Intervention = enhanced self-care*
