# Supplementary material for: Effect of an Enhanced Self-Care Protocol on Lymphedema Status among People Affected by Moderate to Severe Lower-Limb Lymphedema in Bangladesh, a Cluster Randomized Controlled Trial
Source: MDPI journal article supplement (doi:10.3390/jcm9082444), 2020-07-30
Supplement: s1 [file s1]

## Supplementary Table 5. Acute attacks

*Frequency and duration of acute attacks by group and stage previous 6 months.*

|                                                  | Moderate          |                   | Severe            |                   |
|--------------------------------------------------|-------------------|-------------------|-------------------|-------------------|
|                                                  | Control           | Intervention      | Control           | Intervention      |
| <b>Frequency of acute attacks - Median (IQR)</b> |                   |                   |                   |                   |
| <b>Baseline</b>                                  | 5.04 (3.32, 6.76) | 3.96 (2.65, 5.27) | 5.53 (3.36, 7.69) | 6.27 (3.59, 8.95) |
| <b>24 weeks</b>                                  | 0.64 (0.31, 0.97) | 1.77 (1.12, 2.41) | 1.16 (0.58, 1.73) | 1.69 (0.81, 2.57) |
| <b>Change in frequency</b>                       | -4.4              | -2.19             | -4.37             | -4.55             |
| <b>Duration in days - Median (IQR)</b>           |                   |                   |                   |                   |
| <b>Baseline</b>                                  | 4.16 (3.12, 5.20) | 5.44 (4.20, 6.68) | 4.89 (3.51, 6.28) | 3.88 (2.57, 5.19) |
| <b>24 weeks</b>                                  | 0.95 (0.58, 1.33) | 1.9 (1.37, 2.43)  | 1.62 (1.01, 2.22) | 1.2 (0.63, 1.78)  |
| <b>Change in days</b>                            | -3.21             | -3.54             | -3.27             | -2.68             |

*Control = standard self-care, Intervention = enhanced self-care*

*Frequency and duration of acute attacks by group and stage previous one month*

|                                                  | Moderate          |                   | Severe            |                   |
|--------------------------------------------------|-------------------|-------------------|-------------------|-------------------|
|                                                  | Control           | Intervention      | Control           | Intervention      |
| <b>Frequency of acute attacks - Median (IQR)</b> |                   |                   |                   |                   |
| <b>Baseline <i>n=101</i></b>                     | 0.89 (0.59, 1.19) | 0.91 (0.63, 1.2)  | 1.18 (0.73, 1.62) | 1.01 (0.54, 1.47) |
| <b>4 weeks <i>n=84</i></b>                       | 0.71 (0.38, 1.04) | 0.62 (0.39, 0.85) | 0.71 (0.38, 1.04) | 0.91 (0.47, 1.35) |
| <b>12 weeks <i>n=73</i></b>                      | 0.59 (0.33, 0.84) | 0.71 (0.46, 0.96) | 0.62 (0.31, 0.94) | 0.75 (0.35, 1.15) |
| <b>24 weeks <i>n=34</i></b>                      | 0.34 (0.14, 0.53) | 0.59 (0.36, 0.81) | 0.44 (0.18, 0.70) | 0.85 (0.42, 1.28) |
| <b>△ B-24</b>                                    | -0.55             | -0.32             | -0.74             | -0.16             |
| <b>Duration in days - Median (IQR)</b>           |                   |                   |                   |                   |
| <b>Baseline</b>                                  | 4.47 (3.10, 5.85) | 2.99 (2.08, 3.91) | 3.74 (2.33, 5.16) | 4.15 (2.39, 5.91) |
| <b>4 weeks</b>                                   | 1.71 (1.09, 2.33) | 2.58 (1.78, 3.39) | 1.97 (1.14, 2.79) | 2.90 (1.59, 4.21) |
| <b>12 weeks</b>                                  | 1.62 (1.01, 2.23) | 1.59 (1.05, 2.13) | 1.80 (1.02, 2.58) | 1.87 (0.94, 2.81) |
| <b>24 weeks</b>                                  | 0.90 (0.50, 1.31) | 1.20 (0.76, 1.63) | 0.96 (0.47, 1.44) | 1.35 (0.61, 2.08) |
| <b>△ B-24</b>                                    | -3.57             | -1.79             | -2.78             | -2.80             |

*Control = standard self-care, Intervention = enhanced self-care*
