# Supplementary material for: Effect of an Enhanced Self-Care Protocol on Lymphedema Status among People Affected by Moderate to Severe Lower-Limb Lymphedema in Bangladesh, a Cluster Randomized Controlled Trial
Source: MDPI journal article supplement (doi:10.3390/jcm9082444), 2020-07-30
Supplement: s1 [file s1]

### Supplementary Table 3. Mid-calf Circumference

*Baseline mid-calf circumference in cm by group and stage*

| Stage    | Group              | N (legs) | Mean | SD   |
|----------|--------------------|----------|------|------|
| Stage 0  | Standard self-care | 54       | 24.2 | 2.98 |
|          | Enhanced self-care | 58       | 24.3 | 4.21 |
| Moderate | Standard self-care | 55       | 31.8 | 3.82 |
|          | Enhanced self-care | 59       | 30.7 | 4.59 |
| Severe   | Standard self-care | 32       | 35.4 | 4.49 |
|          | Enhanced self-care | 22       | 36.6 | 5.21 |

*SD = standard deviation*

*Change in mid-calf circumference from baseline to follow-up at 4-, 12- and 24-weeks by stage and group.*

|          | 4 weeks                                  |                                          | 12 weeks                                 |                                         | 24 weeks                                |                                         |
|----------|------------------------------------------|------------------------------------------|------------------------------------------|-----------------------------------------|-----------------------------------------|-----------------------------------------|
|          | Control                                  | Intervention                             | Control                                  | Intervention                            | Control                                 | Intervention                            |
| Stage 0  | -1.7%<br>-0.42 (-1.07, 0.23)<br>P=0.205  | -0.4%<br>-0.1 (-0.72, 0.51)<br>P=0.743   | +1.2%<br>0.28 (-0.39, 0.95)<br>P=0.409   | +1.2%<br>0.29 (-0.33, 0.92)<br>P=0.356  | +5.1%<br>1.24 (0.57, 1.91)<br>P<0.001   | +6.0%<br>1.46 (0.84, 2.09)<br>P<0.001   |
| Moderate | -4.8%<br>-1.53 (-2.07, -0.99)<br>P<0.001 | -3.9%<br>-1.21 (-1.72, -0.7)<br>P<0.001  | -4.2%<br>-1.33 (-1.87, -0.78)<br>P<0.001 | -4.3%<br>-1.31 (-1.83, -0.8)<br>P<0.001 | -1.3%<br>-0.40 (-0.95, 0.15)<br>P=0.156 | -0.6%<br>-0.18 (-0.69, 0.33)<br>P=0.488 |
| Severe   | -3.6%<br>-1.27 (-1.92, -0.62)<br>P<0.001 | -2.6%<br>-0.95 (-1.63, -0.27)<br>P=0.006 | -3.3%<br>-1.17 (-1.83, -0.5)<br>P=0.001  | -3.2%<br>-1.16 (1.84, -0.47)<br>P=0.001 | +0.0%<br>0.03 (-0.63, 0.69)<br>P=0.931  | +0.7%<br>0.25 (-0.44, 0.93)<br>P=0.477  |

*Clinically relevant change  $\geq 2\text{cm}$*
