# Supplementary material for: Effect of an Enhanced Self-Care Protocol on Lymphedema Status among People Affected by Moderate to Severe Lower-Limb Lymphedema in Bangladesh, a Cluster Randomized Controlled Trial
Source: MDPI journal article supplement (doi:10.3390/jcm9082444), 2020-07-30
Supplement: s1 [file s1]

## Supplementary Table 2. Lymphoedema stage

*Proportion of legs by stage of lymphoedema and group at baseline and 24-weeks.*

| <b>Control Group</b>      |               |                                |                             |                                 |                               |
|---------------------------|---------------|--------------------------------|-----------------------------|---------------------------------|-------------------------------|
|                           | <i>Leg</i>    | <i>Stage 0</i><br><i>n (%)</i> | <i>Mild</i><br><i>n (%)</i> | <i>Moderate</i><br><i>n (%)</i> | <i>Severe</i><br><i>n (%)</i> |
| Baseline                  |               |                                |                             |                                 |                               |
| n=142 legs                | Left          | 29 (40.8)                      | 1 (1.4)                     | 30 (42.2)                       | 11 (15.5)                     |
|                           | Right         | 25 (35.2)                      | 0 (0.0)                     | 25 (35.2)                       | 21 (29.6)                     |
|                           | Total         | <b>54 (38.0)</b>               | <b>1 (0.7)</b>              | <b>55 (38.7)</b>                | <b>32 (22.5)</b>              |
| 24-weeks                  |               |                                |                             |                                 |                               |
| n=61                      | Left          | 22 (36.1)                      | 0 (0.0)                     | 32 (52.5)                       | 7 (11.5)                      |
|                           | Right         | 21 (34.4)                      | 0 (0.0)                     | 30 (49.2)                       | 10 (16.4)                     |
|                           | Total         | <b>43 (35.2)</b>               | <b>0 (0.0)</b>              | <b>62 (50.8)</b>                | <b>18 (14.8)</b>              |
|                           | $\Delta$ B-24 | -3%                            | -0.7%                       | + 12.1%                         | -8.4%                         |
| <b>Intervention Group</b> |               |                                |                             |                                 |                               |
|                           | <i>Leg</i>    | <i>Stage 0</i><br><i>n (%)</i> | <i>Mild</i><br><i>n (%)</i> | <i>Moderate</i><br><i>n (%)</i> | <i>Severe</i><br><i>n (%)</i> |
| Baseline                  |               |                                |                             |                                 |                               |
| n=71                      | Left          | 26 (36.6)                      | 2 (2.8)                     | 33 (46.4)                       | 10 (14.1)                     |
|                           | Right         | 32 (45.1)                      | 1 (1.4)                     | 26 (36.8)                       | 12 (16.9)                     |
|                           | Total         | <b>58 (40.8)</b>               | <b>3 (2.1)</b>              | <b>59 (41.5)</b>                | <b>22 (15.5)</b>              |
| 24-weeks                  |               |                                |                             |                                 |                               |
| n=66                      | Left          | 26 (39.4)                      | 0 (0.0)                     | 31 (47.0)                       | 7 (10.6)                      |
|                           | Right         | 24 (36.4)                      | 0 (0.0)                     | 34 (51.5)                       | 8 (12.1)                      |
|                           | Total         | <b>50 (37.9)</b>               | <b>0 (0.0)</b>              | <b>65 (49.2)</b>                | <b>15 (11.4)</b>              |
|                           | $\Delta$ B-24 | -3.1%                          | -2.1%                       | + 7.7%                          | -4.1%                         |

$\Delta$  B-24 change from baseline to 24-weeks
