# Supplementary material for: Effect of an Enhanced Self-Care Protocol on Lymphedema Status among People Affected by Moderate to Severe Lower-Limb Lymphedema in Bangladesh, a Cluster Randomized Controlled Trial
Source: MDPI journal article supplement (doi:10.3390/jcm9082444), 2020-07-30
Supplement: s1 [file s1]

## Supplementary Table 4. Indurometer scores

*Baseline Indurometer\* scores by stage and group.*

| Stage    | Group              | N (legs) | Mean | SD   |
|----------|--------------------|----------|------|------|
| Stage 0  | Standard self-care | 52       | 3.44 | 0.78 |
|          | Enhanced self-care | 58       | 3.53 | 0.63 |
| Moderate | Standard self-care | 53       | 3.33 | 0.67 |
|          | Enhanced self-care | 59       | 3.64 | 0.74 |
| Severe   | Standard self-care | 32       | 3.04 | 0.91 |
|          | Enhanced self-care | 22       | 3.17 | 0.92 |

*Change in Indurometer scores from week 4 to 12- and 24- weeks by stage and group.*

|                 | 12 weeks                        |                                 | 24 weeks                        |                                 |
|-----------------|---------------------------------|---------------------------------|---------------------------------|---------------------------------|
|                 | Control                         | Intervention                    | Control                         | Intervention                    |
| <b>Stage 0</b>  | 6.4%                            | 13.9%                           | 1.7%                            | 5.4%                            |
|                 | -0.22 (-0.39, -0.04)<br>P=0.015 | -0.49 (-0.66, -0.33)<br>P<0.001 | -0.06 (-0.24, 0.11)<br>P=0.478  | -0.19 (-0.36, -0.02)<br>P=0.030 |
| <b>Moderate</b> | 11.1%                           | 17.9%                           | 8.7%                            | 11.3%                           |
|                 | -0.37 (-0.54, -0.2)<br>P<0.001  | -0.65 (-0.81, -0.48)<br>P<0.001 | -0.29 (-0.46, -0.11)<br>P=0.001 | -0.41 (-0.57, -0.24)<br>P<0.001 |
| <b>Severe</b>   | 13.2%                           | 21.5%                           | 7.9%                            | 11.4%                           |
|                 | -0.4 (-0.62, -0.18)<br>P<0.001  | -0.68 (-0.91, -0.45)<br>P<0.001 | -0.24 (-0.45, -0.02)<br>P=0.035 | -0.36 (-0.59, -0.12)<br>P=0.003 |

*Control = standard self-care, Intervention = enhanced self-care*

*Clinically relevant change  $\geq 10\%$*
