# Supplementary material for: Effect of an Enhanced Self-Care Protocol on Lymphedema Status among People Affected by Moderate to Severe Lower-Limb Lymphedema in Bangladesh, a Cluster Randomized Controlled Trial
Source: MDPI journal article supplement (doi:10.3390/jcm9082444), 2020-07-30
Supplement: s1 [file s1]

## Supplementary Table 1. Summary of the self-care protocols

*Summary of the standard self-care (control group) and enhanced self-care (intervention group) protocols*

| <b>Activity</b>                                 | <b>Group</b> | <b>Frequency</b>                           | <b>Materials supplied (timepoint)</b>                        |
|-------------------------------------------------|--------------|--------------------------------------------|--------------------------------------------------------------|
| Daily washing and drying of affected body parts | both         | At least twice per day                     | 2 bars of plain soap, 2 wash cloths & drying towels (B0,F12) |
| Treating entry lesions                          | both         | Daily                                      | 1 tube of antibiotic cream & a gauze bandage (B0,F12)        |
| Treating interdigital lesions                   | both         | Daily                                      | One tube of antifungal cream (B0,F12)                        |
| Trimming nails                                  | both         | As needed                                  | Nail clippers (B0,F12)                                       |
| Standing exercises                              | both         | Once or twice per day                      | None needed                                                  |
| Seated exercises                                | both         | Once or twice per day                      | None needed                                                  |
| Daytime elevation                               | both         | Whenever possible                          | None needed                                                  |
| Overnight elevation                             | both         | Every night                                | None needed                                                  |
| Massage                                         | IG           | Once or twice per day                      | 500ml coconut oil (B0,F12)                                   |
| Skin and tissue mobilisation                    | IG           | Once or twice per day                      | None needed                                                  |
| Breathing exercises                             | IG           | 5 breaths at least 5 times per day         | None needed                                                  |
| Lying down exercises                            | IG           | 5 movements each leg once or twice per day | None needed                                                  |
| Walking                                         | IG           | At least 15 minutes, 4 times per day       | None needed                                                  |
| Water                                           | IG           | At least 5 glasses per day                 | Usual source                                                 |
| Fresh fruit and veg                             | IG           | One serve on at least 4 days per week      | Usual source                                                 |

*IG = Intervention Group B0 = baseline, F12= 12 week follow-up*
